# Supplementary material for: HERA: a high-resolution pan-European hydrological reanalysis (1951–2020)
Source: Copernicus journal article supplement (doi:10.5194/essd-17-293-2025), 2025-01-30
Supplement: Supplementary file 1 [file essd-17-293-2025-supplement.pdf]

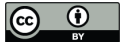

*Supplement of*

**HERA: a high-resolution pan-European hydrological reanalysis (1951–2020)**

**Aloïs Tilloy et al.**

*Correspondence to:* Aloïs Tilloy ([alois.tilloy@ec.europa.eu](mailto:alois.tilloy@ec.europa.eu))

The copyright of individual parts of the supplement might differ from the article licence.

# Supplement of: **HERA: a high-resolution pan-European hydrological reanalysis (1951-2020)**

Tilloy et al. (2024)

Corresponding to Aloïs Tilloy ([alois.tilloy@ec.europa.eu](mailto:alois.tilloy@ec.europa.eu))

## **Contents**

|                                            |    |
|--------------------------------------------|----|
| Model calibration .....                    | 2  |
| Model inputs .....                         | 4  |
| Model validation .....                     | 12 |
| Gauging stations used in calibration ..... | 12 |
| Comparison with EUmHM run .....            | 15 |
| References:.....                           | 19 |

## Model calibration

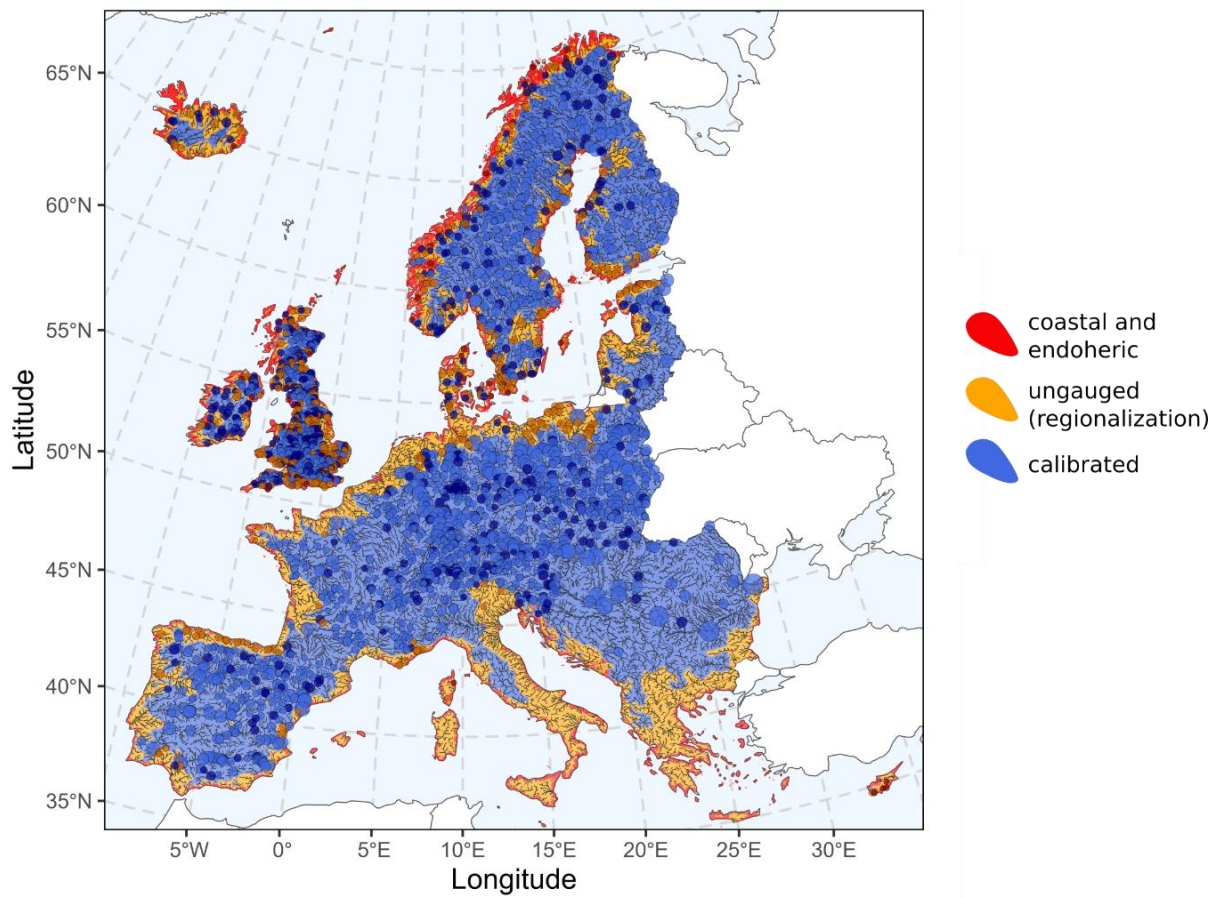

**Figure S1: HERA domain with spatial distribution of catchments with calibrated (blue, 69.6% of domain area), regionalized (orange, 23.9% of domain area) and default (red, 6.5% of domain area) parameters. Dots represent the 2448 stations used for the validation of HERA. Dots are coloured according to their calibration status: red (default), orange (regionalized), light blue (calibrated domain), dark blue (stations used for the calibration).**

**Table S1: LISFLOOD calibration parameter for EFAS-5 (for more details, refer to CEMS-Flood online documentation, 2023)**

| <b>Parameter name</b>        | <b>Description</b>                                                                                                                                       | <b>Default value</b> | <b>Parameter range</b> |
|------------------------------|----------------------------------------------------------------------------------------------------------------------------------------------------------|----------------------|------------------------|
| <i>SnowMeltCoef</i>          | Snow melt rate in degree day model equation [mm/(C day)]                                                                                                 | 4                    | [2.5 – 6.5]            |
| <i>b_Xinjiang</i>            | Exponent in Xinjiang equation for infiltration capacity of the soil [-]                                                                                  | 0.5                  | [0.01 – 5]             |
| <i>PowerPrefFlow</i>         | Exponent in the empirical function describing the preferential flow (i.e. flow that bypasses the soil matrix and drains directly to the groundwater) [-] | 4                    | [0.5 – 8]              |
| <i>UpperZoneTimeConstant</i> | Time constant for upper groundwater zone [days]                                                                                                          | 10                   | [0.01 – 40]            |
| <i>GwPercValue</i>           | Maximum percolation rate from upper to lower groundwater zone [mm/day]                                                                                   | 0.8                  | [0.01 – 2]             |
| <i>LowerZoneTimeConstant</i> | Time constant for lower groundwater zone [days]                                                                                                          | 100                  | [40 – 500]             |
| <i>LZThreshold</i>           | Threshold to stop outflow from lower groundwater zone to the channel [mm]                                                                                | 10                   | [0 – 30]               |
| <i>GwLoss</i>                | Maximum loss rate out of lower groundwater zone expressed as a fraction of lower zone outflow [-]                                                        | 0                    | [0 – 1]                |
| <i>QSplitMult</i>            | Multiplier to adjust discharge triggering floodplains flow [-]                                                                                           | 2                    | [0 – 20]               |
| <i>CalChanMan1</i>           | Multiplier for channel Manning's coefficient n for riverbed [-]                                                                                          | 1                    | [0.5 – 2]              |
| <i>CalChanMan2</i>           | Multiplier for channel Manning's coefficient n for floodplains [-]                                                                                       | 1                    | [0.5 – 5]              |
| <i>adjust_Normal_Flood</i>   | Multiplier to adjust reservoir normal filling (balance between lower and upper limit of reservoir filling). [-]                                          | 0.8                  | [0.01 – 0.99]          |
| <i>ReservoirRnormqMult</i>   | Multiplier to adjust normal reservoir outflow [-]                                                                                                        | 1                    | [0.25 – 2]             |
| <i>LakeMultiplier</i>        | Multiplier to adjust lake outflow [-]                                                                                                                    | 1                    | [0.5 – 2]              |

## Model inputs

**Table S2: Surface field maps used as input to OS LISFLOOD to general the hydrological reanalysis. HERA refers to the HERA dataset while LF-EU maps refers to the LISFLOOD static and parameter maps for Europe (2024) dataset. More information on main data sources is provided in Table S3.**

| Surface field name                                  | Description                                                                                                                                                              | Main data source           | Data location |
|-----------------------------------------------------|--------------------------------------------------------------------------------------------------------------------------------------------------------------------------|----------------------------|---------------|
| <i>Morphology and river network</i>                 |                                                                                                                                                                          |                            |               |
| <i>Mask area</i>                                    | Boolean map defining model boundaries                                                                                                                                    |                            | HERA          |
| <i>Local drainage direction (LDD)</i>               | Connects every grid-cell forming a river network from springs to mouth                                                                                                   | CaMa-Flood                 | LF-EU maps    |
| <i>Grid-cell area (pixArea)</i>                     | Area of every grid cell                                                                                                                                                  | CaMa-Flood                 | LF-EU maps    |
| <i>Grid-cell length</i>                             | Length of every grid cell                                                                                                                                                | Grid-cell area             | LF-EU maps    |
| <i>Upstream area (upArea)</i>                       | Accumulated area of all connected grid-cells of the LDD from springs to mouth                                                                                            | LDD, pixArea               | LF-EU maps    |
| <i>Standard deviation of elevation</i>              | Amount of elevation variation within a grid-cell                                                                                                                         | MERID DEM                  | LF-EU maps    |
| <i>Gradient</i>                                     | Elevation gradient between two connected grid-cells                                                                                                                      | MERIT DEM, LDD             | LF-EU maps    |
| <i>Channel bottom width</i>                         | Width of the bottom of the channel                                                                                                                                       | CaMa-Flood                 | LF-EU maps    |
| <i>Channel length</i>                               | Length of river channel in each grid-cell                                                                                                                                | CaMa-Flood                 | LF-EU maps    |
| <i>Channel gradient</i>                             | Gradient (slope) of river channel inside a grid-cell                                                                                                                     | MERIT DEM, CaMa-Flood, LDD | LF-EU maps    |
| <i>Manning's roughness coefficient for channels</i> | Manning's roughness coefficient of river channel for each grid-cell                                                                                                      | MERIT DEM, upArea          | LF-EU maps    |
| <i>Channel mask</i>                                 | Channel presence in the grid-cell indicator                                                                                                                              | Mask                       | HERA          |
| <i>Side slope</i>                                   | Slope of river banks                                                                                                                                                     |                            | LF-EU maps    |
| <i>Bankful channel depth</i>                        | Channel depth                                                                                                                                                            | upArea                     | LF-EU maps    |
| <i>Vegetation types and properties</i>              |                                                                                                                                                                          |                            |               |
| <i>Crop coefficient for forest</i>                  | Ratio between the potential (reference) evapotranspiration rate, in mm/day, and the potential evaporation rate of forest (averaged by time and ecosystem type)           | CGLS-LC100, SPAM, FAO      | LF-EU maps    |
| <i>Crop coefficient for irrigated crops</i>         | Ratio between the potential (reference) evapotranspiration rate, in mm/day, and the potential evaporation rate of irrigated crops (averaged by time and ecosystem type)  | CGLS-LC100, SPAM, FAO      | LF-EU maps    |
| <i>Crop coefficient for other cover type</i>        | Ratio between the potential (reference) evapotranspiration rate, in mm/day, and the potential evaporation rate of other cover type (averaged by time and ecosystem type) | CGLS-LC100, SPAM, FAO      | LF-EU maps    |
| <i>Crop group number for forest</i>                 | Represents a vegetation type and is an indicator of its adaptation to dry climate (forest)                                                                               | CGLS-LC100,                | LF-EU maps    |

|                                                                      |                                                                                                                                                                    |                             |            |
|----------------------------------------------------------------------|--------------------------------------------------------------------------------------------------------------------------------------------------------------------|-----------------------------|------------|
|                                                                      |                                                                                                                                                                    | SPAM,<br>FAO                |            |
| <i>Crop group number for irrigated crops</i>                         | Represents a vegetation type and is an indicator of its adaptation to dry climate (irrigated crops)                                                                | CGLS-LC100,<br>SPAM,<br>FAO | LF-EU maps |
| <i>Crop group number for other cover type</i>                        | Represents a vegetation type and is an indicator of its adaptation to dry climate (other)                                                                          | CGLS-LC100,<br>SPAM,<br>FAO | LF-EU maps |
| <i>Manning's surface roughness coefficient for forest</i>            | Roughness or friction applied to the flow by the surface on which water is flowing (forest)                                                                        | CGLS-LC100,<br>SPAM,<br>FAO | LF-EU maps |
| <i>Manning's surface roughness coefficient for irrigated crop</i>    | Roughness or friction applied to the flow by the surface on which water is flowing (irrigated crops)                                                               | CGLS-LC100,<br>SPAM,<br>FAO | LF-EU maps |
| <i>Manning's surface roughness coefficient for other cover types</i> | Roughness or friction applied to the flow by the surface on which water is flowing (other)                                                                         | CGLS-LC100,<br>SPAM,<br>FAO | LF-EU maps |
| <i>Leaf area index for forest</i>                                    | Defined as half the total area of green elements of the canopy per unit horizontal ground area m <sup>2</sup> /m <sup>2</sup> (10-day average; 36 fields in total) | CGLS-LAI                    | LF-EU maps |
| <i>Leaf area index for irrigated crop</i>                            | Defined as half the total area of green elements of the canopy per unit horizontal ground area m <sup>2</sup> /m <sup>2</sup> (10-day average; 36 fields in total) | CGLS-LAI                    | LF-EU maps |
| <i>Leaf area index for other cover types</i>                         | Defined as half the total area of green elements of the canopy per unit horizontal ground area m <sup>2</sup> /m <sup>2</sup> (10-day average; 36 fields in total) | CGLS-LAI                    | LF-EU maps |
| <i>Rice planting day 1</i>                                           | Most probable day of the year when rice is planted for the first time                                                                                              | RiceAtlas                   | LF-EU maps |
| <i>Rice planting day 2</i>                                           | Most probable day of the year when rice is planted for the second time                                                                                             | RiceAtlas                   | LF-EU maps |
| <i>Rice planting day 3</i>                                           | Most probable day of the year when rice is planted for the third time                                                                                              | RiceAtlas                   | LF-EU maps |
| <i>Rice harvesting day 1</i>                                         | Most probable day of the year when rice is harvested after planting for the first time                                                                             | RiceAtlas                   | LF-EU maps |
| <i>Rice harvesting day 2</i>                                         | Most probable day of the year when rice is harvested after planting for the second time                                                                            | RiceAtlas                   | LF-EU maps |
| <i>Rice harvesting day 3</i>                                         | Most probable day of the year when rice is harvested after planting for the third time                                                                             | RiceAtlas                   | LF-EU maps |
| <b>Soil properties</b>                                               |                                                                                                                                                                    |                             |            |
| <i>Soil depth layer 1 for forest</i>                                 | Forest soil depth for surface soil [layer 1]                                                                                                                       | SoilGrids                   | LF-EU maps |
| <i>Soil depth layer 1 for other</i>                                  | Other soil depth for surface soil [layer 1]                                                                                                                        | SoilGrids                   | LF-EU maps |
| <i>Soil depth layer 2 for forest</i>                                 | Forest soil depths for middle soil [layer 2]                                                                                                                       | SoilGrids                   | LF-EU maps |
| <i>Soil depth layer 2 for other</i>                                  | Other soil depths for middle soil [layer 2]                                                                                                                        | SoilGrids                   | LF-EU maps |
| <i>Soil depth layer 3 for forest</i>                                 | Forest soil depths for subsoil [layer 3]                                                                                                                           | SoilGrids                   | LF-EU maps |

|                                                                       |                                                                                                  |           |            |
|-----------------------------------------------------------------------|--------------------------------------------------------------------------------------------------|-----------|------------|
| <i>Soil depth layer 3 for other</i>                                   | Other soil depths for subsoil [layer 3]                                                          | SoilGrids | LF-EU maps |
| <i>Saturated volumetric soil moisture content layers 1 for forest</i> | Maximum water content in surface soil for forest                                                 | SoilGrids | LF-EU maps |
| <i>Saturated volumetric soil moisture content layers 1 for other</i>  | Maximum water content in surface soil for other                                                  | SoilGrids | LF-EU maps |
| <i>Saturated volumetric soil moisture content layers 2 for forest</i> | Maximum water content in middle soil for forest                                                  | SoilGrids | LF-EU maps |
| <i>Saturated volumetric soil moisture content layers 2 for other</i>  | Maximum water content in middle soil for other                                                   | SoilGrids | LF-EU maps |
| <i>Saturated volumetric soil moisture content layers 3</i>            | Maximum water content in subsoil                                                                 | SoilGrids | LF-EU maps |
| <i>Residual volumetric soil moisture content layer 1</i>              | Minimum water content in the surface soil                                                        | SoilGrids | LF-EU maps |
| <i>Residual volumetric soil moisture content layer 2</i>              | Minimum water content in the middle soil                                                         | SoilGrids | LF-EU maps |
| <i>Residual volumetric soil moisture content layer 3</i>              | Minimum water content in the subsoil                                                             | SoilGrids | LF-EU maps |
| <i>Pore size index layer 1 for forest</i>                             | pore size index of the surface soil for forest                                                   | SoilGrids | LF-EU maps |
| <i>Pore size index layer 1 for other</i>                              | Van Genuchten parameter $\lambda$ representing the pore size index of the surface soil for other | SoilGrids | LF-EU maps |
| <i>Pore size index layer 2 for forest</i>                             | Van Genuchten parameter $\lambda$ representing the pore size index of the middle soil for forest | SoilGrids | LF-EU maps |
| <i>Pore size index layer 2 for other</i>                              | Van Genuchten parameter $\lambda$ representing the pore size index of the middle soil for other  | SoilGrids | LF-EU maps |
| <i>Pore size index layer 3</i>                                        | Van Genuchten parameter $\lambda$ representing the pore size index of the subsoil                | SoilGrids | LF-EU maps |
| <i>Van Genuchten equation parameter layer 1 for forest</i>            | Van Genuchten parameter $\alpha$ of the surface soil for forest                                  | SoilGrids | LF-EU maps |
| <i>Van Genuchten equation parameter layer 1 for other</i>             | Van Genuchten parameter $\alpha$ of the surface soil for other                                   | SoilGrids | LF-EU maps |
| <i>Van Genuchten equation parameter layer 2 for forest</i>            | Van Genuchten parameter $\alpha$ of the middle soil for forest                                   | SoilGrids | LF-EU maps |
| <i>Van Genuchten equation parameter layer 2 for other</i>             | Van Genuchten parameter $\alpha$ of the middle soil for other                                    | SoilGrids | LF-EU maps |
| <i>Van Genuchten equation parameter layer 3</i>                       | Van Genuchten parameter $\alpha$ of the subsoil                                                  | SoilGrids | LF-EU maps |
| <i>Saturated soil conductivity for layer 1 forest</i>                 | Ease with which water moves through pore spaces of the surface soil for forest                   | SoilGrids | LF-EU maps |

|                                                       |                                                                                                                                                                                                   |                                |                         |
|-------------------------------------------------------|---------------------------------------------------------------------------------------------------------------------------------------------------------------------------------------------------|--------------------------------|-------------------------|
| <i>Saturated soil conductivity for layer 1 other</i>  | Ease with which water moves through pore spaces of the surface soil for other                                                                                                                     | SoilGrids                      | LF-EU maps              |
| <i>Saturated soil conductivity for layer 2 forest</i> | Ease with which water moves through pore spaces of the middle soil for forest                                                                                                                     | SoilGrids                      | LF-EU maps              |
| <i>Saturated soil conductivity for layer 2 other</i>  | Ease with which water moves through pore spaces of the middle soil for other                                                                                                                      | SoilGrids                      | LF-EU maps              |
| <i>Saturated soil conductivity for layer 3</i>        | Ease with which water moves through pore spaces of the subsoil                                                                                                                                    | SoilGrids                      | LF-EU maps              |
| <b><i>Land use</i></b>                                |                                                                                                                                                                                                   |                                |                         |
| <i>Forest surface fraction</i>                        | Evergreen and deciduous needle leaf and broad leaf tree areas                                                                                                                                     | CGLS-LC100, HANZE,             | HERA/socioeconomic_maps |
| <i>Sealed surface fraction</i>                        | Urban areas, characterizing the human impact on the environment                                                                                                                                   | CGLS-LC100, HANZE,             | HERA/socioeconomic_maps |
| <i>Irrigated surface fraction</i>                     | Irrigated areas of all possible crops excluding rice                                                                                                                                              | CLC2018, HANZE                 | HERA/socioeconomic_maps |
| <i>Inland water fraction</i>                          | Rivers, freshwater and saline lakes, ponds and other permanent water bodies over the continents                                                                                                   | CGLS-LC100, HANZE              | HERA/socioeconomic_maps |
| <i>Irrigated rice fraction</i>                        | Irrigated areas of rice                                                                                                                                                                           | CLC2018, SPAM, HANZE           | HERA/socioeconomic_maps |
| <i>Other land cover fraction</i>                      | Agricultural areas, non-forested natural area, pervious surface of urban areas                                                                                                                    |                                | HERA/socioeconomic_maps |
| <b><i>Water demand</i></b>                            |                                                                                                                                                                                                   |                                |                         |
| <i>Water demand for domestic use</i>                  | Daily supply of water volume for indoor and outdoor household purposes and for all the uses that are connected to the municipal system (e.g., water used by shops, schools, and public buildings) | GHS-POP, AQUAST AT, MSWX       | HERA/water_demand       |
| <i>Water demand for industrial use</i>                | Daily supply of water volume for fabricating, processing, washing and sanitation, cooling or transporting a product, incorporating water into a product                                           | GHS-POP, AQUAST AT, GCAM       | HERA/water_demand       |
| <i>Water demand for thermoelectric use</i>            | Daily supply of water volume for the cooling of thermoelectric and nuclear power plant                                                                                                            | GHS-POP, AQUAST AT, GCAM, MSWX | HERA/water_demand       |
| <i>Water demand for livestock use</i>                 | Daily supply of water volume for domestic animal need                                                                                                                                             | AQUAST AT, GCAM, GLW3          | HERA/water_demand       |
| <b><i>Lakes and reservoirs</i></b>                    |                                                                                                                                                                                                   |                                |                         |
| <i>Lake mask</i>                                      | Area covered by lakes only (binary representation)                                                                                                                                                | GLWD                           | LF-EU maps              |
| <i>Reservoir map</i>                                  | Location and identifier of each reservoir                                                                                                                                                         | EFAS, HANZE, Grand             | HERA/reservoirs         |





**Table S3: Main datasets used in the creation of surface field inputs for LISFLOOD model. More information on the generation of these surface fields can be found in Choulga et al. (2023).**

| <b>Dataset name</b> | <b>Description</b>                                                                                                                                                                                                                                                              | <b>Data source</b>                                                                                                                                                          |
|---------------------|---------------------------------------------------------------------------------------------------------------------------------------------------------------------------------------------------------------------------------------------------------------------------------|-----------------------------------------------------------------------------------------------------------------------------------------------------------------------------|
| <b>AQUASTA T</b>    | <i>FAO's global information system on water resources and agricultural water management.</i>                                                                                                                                                                                    | <a href="https://www.fao.org/land-and-water/databases-and-software/aquastat/en/">https://www.fao.org/land-and-water/databases-and-software/aquastat/en/</a>                 |
| <b>CaMa-Flood</b>   | <i>The Catchment-based Macro-scale Floodplain (CaMa-Flood) Global River Hydrodynamics Model v4.0 265 maps (CaMa-Flood) is a global hydrography dataset.</i>                                                                                                                     | <a href="http://hydro.iis.u-tokyo.ac.jp/~yamada/cama-flood/">http://hydro.iis.u-tokyo.ac.jp/~yamada/cama-flood/</a>                                                         |
| <b>CGLS-LAI</b>     | <i>The Copernicus Global Land Service (CGLS) Leaf Area Index (LAI) 1km Version 2 collection (CGLS-LAI) is a set of global maps data describing vegetation dynamics – the annual evolution of LAI at 10-day intervals over the period of 1999-2020.</i>                          | <a href="https://land.copernicus.eu/global/products/lai">https://land.copernicus.eu/global/products/lai</a>                                                                 |
| <b>CGLS-LC100</b>   | <i>The Copernicus Global Land Service Land Cover (LC) 100m map (CGLS-LC100) 283 is a global land cover map of the year 2015.</i>                                                                                                                                                | <a href="https://land.copernicus.eu/global/products/lc">https://land.copernicus.eu/global/products/lc</a>                                                                   |
| <b>CLC2018</b>      | <i>The Coordination of Information on the Environment (CORINE) Land Cover (CLC) inventory for 2018 (CLC2018) is a set of maps describing the land cover/ land use status of 2018 covering 39 countries in Europe.</i>                                                           | <a href="https://land.copernicus.eu/en/products/corine-land-cover/clc2018">https://land.copernicus.eu/en/products/corine-land-cover/clc2018</a>                             |
| <b>FAO</b>          | <i>The FAO Irrigation and Drainage Paper No. 56 (FAO) is a publication covering geographically referenced statistics for crop development stages, crop coefficients, crop height, rooting depth, and soil water depletion fraction for common crops found across the world.</i> | <a href="https://www.fao.org/land-and-water/databases-and-software/crop-information/en/">https://www.fao.org/land-and-water/databases-and-software/crop-information/en/</a> |
| <b>GCAM</b>         | <i>Global Change Analysis Model (GCAM) is an integrated, multi-sector model developed by the Joint Global Change Research Institute (JGCRI) to explore the overall behaviour of human and physical systems dynamics and interactions.</i>                                       | <a href="https://github.com/JGCRI/gcam-core">https://github.com/JGCRI/gcam-core</a>                                                                                         |
| <b>GHS-POP</b>      | <i>The Global Human Settlement Population Grid multitemporal version R2019A (GHS POP) is a spatial raster dataset that depicts the distribution of population, expressed as the number of people per grid-cell.</i>                                                             | <a href="https://ghsl.jrc.ec.europa.eu/ghs_pop2019.php">https://ghsl.jrc.ec.europa.eu/ghs_pop2019.php</a>                                                                   |
| <b>GLWD</b>         | <i>The Global Lakes and Wetlands Database (GLWD) is a global database of water bodies.</i>                                                                                                                                                                                      | <a href="https://www.worldwildlife.org/pages/global-lakes-and-wetlands-database">https://www.worldwildlife.org/pages/global-lakes-and-wetlands-database</a>                 |
| <b>GRanD</b>        | <i>The Global Reservoir and Dam Database (GRanD) is a product of the Global Water System Project. It collates existing dam and reservoir datasets with the aim of providing a single, geographically explicit and reliable database for the scientific community.</i>           | <a href="https://www.globaldamwatch.org/directory">https://www.globaldamwatch.org/directory</a>                                                                             |
| <b>HANZE</b>        | <i>The Historical Analysis of Natural Hazards in Europe (HANZE) is a pan-European database of exposure to natural hazards and damaging historical floods since 1870.</i>                                                                                                        | <a href="https://data.4tu.nl/collections/5065346/1">https://data.4tu.nl/collections/5065346/1</a>                                                                           |
| <b>MERIT DEM</b>    | <i>Multi-Error-Removed Improved-Terrain Digital Elevation Model v.1.0.3 (MERIT DEM) is a high accuracy global DEM at 3 arc second resolution (~90 m at the Equator).</i>                                                                                                        | <a href="http://hydro.iis.u-tokyo.ac.jp/~yamada/MERIT_DEM/">http://hydro.iis.u-tokyo.ac.jp/~yamada/MERIT_DEM/</a>                                                           |
| <b>MSWX</b>         | <i>Multi-Source Weather (MSWX) is a high-resolution (3-hourly, 0.1°), bias-corrected meteorological product with global coverage from 1979 to present.</i>                                                                                                                      | <a href="https://www.gloh2o.org/mswx/">https://www.gloh2o.org/mswx/</a>                                                                                                     |

---

|                  |                                                                                                                                                                                                                                                                                               |                                                                                                                                                                               |
|------------------|-----------------------------------------------------------------------------------------------------------------------------------------------------------------------------------------------------------------------------------------------------------------------------------------------|-------------------------------------------------------------------------------------------------------------------------------------------------------------------------------|
| <b>RiceAtlas</b> | <i>The RiceAtlas v3 (RiceAtlas) is a spatial database of global rice calendars and production.</i>                                                                                                                                                                                            | <a href="https://dataverse.harvard.edu/dataset.xhtml?persistentId=doi:10.7910/DVN/JE6R2R">https://dataverse.harvard.edu/dataset.xhtml?persistentId=doi:10.7910/DVN/JE6R2R</a> |
| <b>SPAM</b>      | <i>The Spatial Production Allocation Model (SPAM) – Global Spatially-Disaggregated Crop Production Statistics Data for 2010 v2.0 (SPAM2010) is a global dataset which redistributes crop production information from country and sub-national provinces level to a finer grid-cell level.</i> | <a href="https://mapspam.info/data/">https://mapspam.info/data/</a>                                                                                                           |
| <b>SoilGrids</b> | <i>The International Soil Reference and Information Centre (ISRIC) SoilGrids250m global gridded soil information release 2017 (fSoilGrids) is as a set of global soil property and class maps at 250 m resolution.</i>                                                                        | <a href="https://www.isric.org/explore/soilgrids/faq-soilgrids-2017">https://www.isric.org/explore/soilgrids/faq-soilgrids-2017</a>                                           |

---

**Table S4: Water demand in km<sup>3</sup>.y<sup>-1</sup> by sector used for the HERA simulation (1951-2020) over the EFAS domain. Values correspond to Figure 4.c.**

| <b>year</b> | <b>Domestic</b> | <b>Energy</b> | <b>Industrial</b> | <b>Livestock</b> | <b>Total</b> |
|-------------|-----------------|---------------|-------------------|------------------|--------------|
| 1951        | 34.04           | 46.21         | 38.98             | 6.28             | 125.51       |
| 1952        | 35.02           | 48.27         | 40.70             | 6.28             | 130.26       |
| 1953        | 36.00           | 50.12         | 42.49             | 6.28             | 134.88       |
| 1954        | 36.99           | 52.07         | 44.21             | 6.28             | 139.55       |
| 1955        | 37.95           | 54.04         | 46.03             | 6.28             | 144.29       |
| 1956        | 39.04           | 56.24         | 47.93             | 6.28             | 149.49       |
| 1957        | 40.16           | 58.19         | 49.88             | 6.28             | 154.50       |
| 1958        | 41.27           | 60.26         | 51.79             | 6.28             | 159.60       |
| 1959        | 42.40           | 62.32         | 53.68             | 6.28             | 164.69       |
| 1960        | 40.18           | 55.42         | 49.73             | 6.28             | 151.62       |
| 1961        | 41.32           | 56.99         | 51.00             | 6.28             | 155.58       |
| 1962        | 42.54           | 59.07         | 52.45             | 6.28             | 160.34       |
| 1963        | 43.94           | 60.87         | 53.61             | 6.28             | 164.69       |
| 1964        | 45.46           | 63.84         | 55.79             | 6.28             | 171.36       |
| 1965        | 46.88           | 65.34         | 57.42             | 6.28             | 175.92       |
| 1966        | 48.37           | 67.04         | 59.04             | 6.28             | 180.74       |
| 1967        | 49.83           | 69.15         | 60.83             | 6.28             | 186.09       |
| 1968        | 51.51           | 71.59         | 62.80             | 6.28             | 192.18       |
| 1969        | 53.36           | 74.52         | 65.20             | 6.28             | 199.36       |
| 1970        | 55.17           | 78.01         | 67.72             | 6.28             | 207.19       |
| 1971        | 56.96           | 80.57         | 69.76             | 6.28             | 213.56       |
| 1972        | 59.20           | 84.29         | 72.66             | 6.28             | 222.42       |
| 1973        | 62.22           | 88.49         | 76.70             | 6.28             | 233.69       |
| 1974        | 64.59           | 90.82         | 79.59             | 6.28             | 241.27       |
| 1975        | 66.15           | 91.74         | 80.68             | 6.28             | 244.84       |
| 1976        | 68.41           | 95.47         | 84.04             | 6.28             | 254.20       |
| 1977        | 70.58           | 96.43         | 85.53             | 6.28             | 258.82       |
| 1978        | 72.94           | 99.59         | 88.32             | 6.28             | 267.13       |
| 1979        | 76.85           | 103.98        | 92.79             | 6.28             | 279.90       |
| 1980        | 77.37           | 104.31        | 93.41             | 6.28             | 281.36       |
| 1981        | 78.25           | 104.52        | 93.77             | 6.28             | 282.82       |
| 1982        | 78.95           | 104.83        | 94.20             | 6.28             | 284.26       |
| 1983        | 79.51           | 105.67        | 94.69             | 6.28             | 286.14       |
| 1984        | 79.88           | 106.26        | 95.24             | 6.28             | 287.66       |
| 1985        | 80.64           | 107.08        | 95.74             | 6.28             | 289.74       |
| 1986        | 81.19           | 107.59        | 96.18             | 6.28             | 291.24       |
| 1987        | 81.82           | 108.12        | 96.75             | 6.28             | 292.96       |
| 1988        | 82.61           | 108.52        | 97.52             | 6.28             | 294.93       |
| 1989        | 83.88           | 109.09        | 98.39             | 6.28             | 297.64       |
| 1990        | 84.95           | 109.56        | 99.38             | 6.28             | 300.17       |
| 1991        | 85.69           | 109.19        | 97.89             | 6.17             | 298.93       |
| 1992        | 86.29           | 107.96        | 96.55             | 6.07             | 296.88       |
| 1993        | 86.61           | 104.48        | 94.70             | 5.99             | 291.78       |
| 1994        | 86.76           | 103.76        | 94.12             | 5.91             | 290.54       |
| 1995        | 86.95           | 102.17        | 93.16             | 5.85             | 288.13       |
| 1996        | 86.83           | 100.36        | 92.13             | 5.79             | 285.11       |
| 1997        | 87.21           | 100.46        | 91.82             | 5.75             | 285.25       |
| 1998        | 88.42           | 100.09        | 90.90             | 5.73             | 285.14       |
| 1999        | 89.59           | 99.32         | 89.87             | 5.72             | 284.50       |
| 2000        | 90.58           | 99.01         | 89.04             | 5.73             | 284.36       |
| 2001        | 91.94           | 98.60         | 87.98             | 5.74             | 284.26       |
| 2002        | 93.13           | 98.19         | 86.90             | 5.77             | 283.98       |
| 2003        | 92.65           | 96.80         | 83.46             | 5.79             | 278.70       |
| 2004        | 92.03           | 95.50         | 80.06             | 5.82             | 273.41       |
| 2005        | 91.84           | 94.20         | 76.67             | 5.86             | 268.56       |

|             |       |       |       |       |        |
|-------------|-------|-------|-------|-------|--------|
| <b>2006</b> | 91.45 | 92.96 | 73.11 | 6.09  | 263.62 |
| <b>2007</b> | 91.05 | 91.83 | 69.58 | 6.35  | 258.81 |
| <b>2008</b> | 90.49 | 90.36 | 67.06 | 6.62  | 254.53 |
| <b>2009</b> | 90.39 | 88.44 | 64.42 | 6.90  | 250.16 |
| <b>2010</b> | 90.07 | 86.91 | 61.94 | 7.21  | 246.13 |
| <b>2011</b> | 89.72 | 84.60 | 60.29 | 7.61  | 242.22 |
| <b>2012</b> | 89.15 | 82.25 | 58.61 | 8.00  | 238.00 |
| <b>2013</b> | 90.44 | 81.74 | 58.39 | 8.37  | 238.94 |
| <b>2014</b> | 91.49 | 81.21 | 58.16 | 8.74  | 239.61 |
| <b>2015</b> | 92.52 | 80.71 | 57.92 | 9.10  | 240.25 |
| <b>2016</b> | 93.36 | 79.86 | 57.99 | 9.30  | 240.51 |
| <b>2017</b> | 94.63 | 79.08 | 58.09 | 9.49  | 241.29 |
| <b>2018</b> | 95.24 | 80.43 | 60.19 | 9.68  | 245.54 |
| <b>2019</b> | 95.89 | 80.53 | 61.30 | 9.88  | 247.60 |
| <b>2020</b> | 96.26 | 75.57 | 58.59 | 10.07 | 240.49 |

## **Model validation**

### **Gauging stations used in validation**

**Table S 5 Stations manually checked for the validation of HERA**

| Longitude | Latitude | upa   | StationID | csource       | obs_qa | sim_qa | station            | river_name          | KGE'   | removal | comment                                     | trueUpA | Tlong    | Flat     | dist |
|-----------|----------|-------|-----------|---------------|--------|--------|--------------------|---------------------|--------|---------|---------------------------------------------|---------|----------|----------|------|
| -6.942    | 37.975   | 144   | 2004160   | SpatialQMatch | 0.3    | 1.1    | AROCHE             | NA                  | -1.36  | NO      | Arid catchment                              |         |          |          | 0.7  |
| -0.775    | 40.175   | 666   | 6227620   | GRDCUpA       | 0.8    | 1.0    | EL TERDE           | RIO MIJARES         | -0.47  | NO      | Arid catchment                              |         |          |          | 1.6  |
| -1.625    | 38.408   | 1541  | 2007043   | EFAS          | 0.4    | 2.3    | MINATEDA           | ARROYO DE TOBARRA   | -3.65  | NO      | Arid catchment                              |         |          |          | 1.2  |
| -2.525    | 40.258   | 249   | 2003173   | SpatialQMatch | 0.2    | 1.1    | PERALEJA, LA       | NA                  | -2.58  | NO      | Arid catchment                              |         |          |          | 1.9  |
| 14.792    | 37.658   | 700   | 6353500   | EFAS          | 3.3    | 9.5    | PONTE MACCARRONE   | FIUME SIMETO        | -1.17  | NO      | Arid catchment                              |         |          |          | 0.9  |
| -3.208    | 37.875   | 7019  | 6217500   | EFAS          | 17.2   | 7.5    | POSITO             | RIO GUADIANA MENOR  | -0.52  | NO      | Arid catchment                              |         |          |          | 0.8  |
| -2.275    | 38.242   | 368   | 2007102   | SpatialQMatch | 1.6    | 0.3    | TAIBILLA           | NA                  | -12.68 | NO      | Arid catchment + reservoirs not in HERA     |         |          |          | 1.1  |
| -0.692    | 40.958   | 650   | 2009127   | SpatialQMatch | 0.9    | 0.3    | ALCAINE            | NA                  | -0.53  | NO      | Downstream a reservoir                      |         |          |          | 0.8  |
| -6.142    | 37.675   | 1025  | 2005077   | EFAS          | 3.5    | 8.0    | CENTRAL DE CALA    | NA                  | -0.55  | NO      | Downstream a reservoir                      |         |          |          | 1.0  |
| 13.942    | 37.175   | 1958  | 6353400   | EFAS          | 4.2    | 16.6   | DRASI              | SALSO               | -2.08  | NO      | Downstream a reservoir                      |         |          |          | 0.6  |
| -2.975    | 37.542   | 4073  | 2005019   | SpatialQMatch | 6.7    | 2.6    | NEGRATIN           | NA                  | -1.74  | NO      | Downstream a reservoir                      |         |          |          | 2.9  |
| -4.842    | 42.842   | 322   | 2002035   | SpatialQMatch | 1.4    | 4.8    | OTERO DE GUARDO    | NA                  | -1.66  | NO      | Downstream a reservoir                      |         |          |          | 1.4  |
| 18.575    | 66.992   | 2200  | 3001969   | SpatialQMatch | 61.9   | 26.8   | SEITEVARE KRV      | NA                  | -0.48  | NO      | Downstream a reservoir                      |         |          |          | 1.7  |
| -5.475    | 38.925   | 7672  | 6216630   | EFAS          | 9.7    | 25.8   | ZUJAR              | RIO ZUJAR           | -0.93  | NO      | Downstream a reservoir                      |         |          |          | 2.3  |
| -3.592    | 39.192   | 11966 | 6216520   | EFAS          | 0.8    | 2.7    | VILLARRUBIA        | RIO GUADIANA        | -1.54  | NO      | Downstream a reservoir                      |         |          |          | 0.7  |
| 11.842    | 47.875   | 220   | 6343110   | GRDCUpA       | 1.8    | 7.8    | ERB                | LEITZACH            | -2.55  | YES     | Dubious observations                        |         |          |          | 1.7  |
| 3.375     | 44.192   | 165   | 6125300   | EFAS          | 1.3    | 4.7    | HERMET             | CHAPOUROUX          | -1.60  | YES     | Dubious observations                        |         |          |          | 1.2  |
| 4.625     | 48.742   | 2143  | 6122120   | EFAS          | 3.6    | 21.7   | VITRY-EN-PERTHOIS  | SAULX               | -3.96  | YES     | Dubious observations                        |         |          |          | 0.4  |
| -0.175    | 51.408   | 131   | 4039003   | SpatialQMatch | 1.9    | 1.9    | SOUTH WIMBLETON    | NA                  | -0.57  | NO      | Heavily influenced river (Wandle in London) |         |          |          | 1.3  |
| 13.342    | 58.358   | 714   | 3002371   | SpatialQMatch | 5.6    | 4.6    | ATTORP             | NA                  | -0.52  | NO      | Influenced by reservoir not in HERA         |         |          |          | 0.7  |
| 23.142    | 54.075   | 495   | 990163    | SpatialQMatch | 3.8    | 1.6    | CZERWONY FOLWARK   | NA                  | -1.99  | NO      | Influenced by reservoir not in HERA         |         |          |          | 1.7  |
| 19.242    | 50.142   | 2094  | 910490    | SpatialQMatch | 18.1   | 12.3   | JELEN              | NA                  | -1.60  | NO      | Influenced by reservoir not in HERA         |         |          |          | 1.2  |
| 9.492     | 56.575   | 555   | 6934170   | GRDCUpA       | 4.6    | 3.3    | LOEVEL BRO         | SKALS A             | -0.53  | NO      | Influenced by reservoir not in HERA         |         |          |          | 0.2  |
| 13.658    | 37.475   | 1299  | 6353300   | EFAS          | 2.4    | 12.4   | PASSOFONDUTO       | PLATANI             | -3.39  | NO      | Influenced by reservoir not in HERA         |         |          |          | 1.2  |
| 24.658    | 54.692   | 218   | 6574108   | GRDCUpA       | 2.0    | 0.9    | SEMELISKES         | STREVA              | -1.96  | NO      | Influenced by reservoir not in HERA         |         |          |          | 2.8  |
| 22.992    | 54.075   | 184   | 6474107   | GRDCUpA       | 1.3    | 0.8    | SOBOLEWO           | CZARNA HANCZA       | -0.98  | NO      | Influenced by reservoir not in HERA         |         |          |          | 0.8  |
| 19.175    | 50.242   | 896   | 990138    | SpatialQMatch | 7.3    | 4.5    | NIWKA              | NA                  | -2.01  | NO      | Influenced river                            |         |          |          | 0.8  |
| 19.125    | 50.258   | 521   | 990136    | SpatialQMatch | 4.9    | 4.8    | SZABELNIA          | NA                  | -0.95  | NO      | Influenced river                            |         |          |          | 0.8  |
| 32.475    | 34.742   | 239   | 6196040   | EFAS          | 0.4    | 1.1    | AKHELIA            | POTAMOS TIS EZOUSAS | -1.03  | NO      | Aride catchment                             |         |          |          | 1.1  |
| -0.042    | 51.592   | 1353  | 4038023   | SpatialQMatch | 2.4    | 8.0    | Low Hall           | NA                  | -1.42  | YES     | LONDON channel                              |         |          |          | 1.9  |
| -1.025    | 38.058   | 186   | 2007064   | SpatialQMatch | 4.3    | 1.0    | BENIEL             | NA                  | -0.81  | NO      | Matched wrong river pixel                   | 14230   | -1.00833 | 38.04167 | 2.0  |
| -0.692    | 40.975   | 653   | 2009118   | EFAS          | 1.1    | 0.3    | OLIETE             | NA                  | -0.58  | NO      | Matched wrong river pixel                   | 811     | -0.675   | 40.99167 | 1.9  |
| -2.675    | 40.158   | 358   | 2003172   | SpatialQMatch | 0.6    | 1.2    | HUETE              | NA                  | -0.94  | NO      | Matched wrong river pixel                   | 476     | -2.6917  | 40.2083  | 2.9  |
| 6.825     | 50.742   | 298   | 6335040   | GRDCUpA       | 0.8    | 3.0    | WEILERSWIST        | SWISTBACH           | -2.50  | NO      | Matched wrong river pixel                   | 300     | 6.8583   | 50.7583  | 3.1  |
| -2.592    | 55.508   | 695   | 4021025   | SpatialQMatch | 2.9    | 15.1   | Anerum             | NA                  | -3.25  | NO      | Matched wrong river pixel                   | 183     | -2.60823 | 55.52474 | 0.8  |
| 9.408     | 48.658   | 191   | 6335700   | GRDCUpA       | 1.2    | 2.8    | OBERENSINGEN       | AICH                | -0.46  | NO      | Matched wrong river pixel                   | 169     | 9.2917   | 48.64167 | 1.9  |
| 13.125    | 56.125   | 1177  | 3001635   | SpatialQMatch | 3.1    | 8.7    | KLIPPAN 2          | NA                  | -0.93  | NO      | Matched wrong river pixel                   | 150     | 13.1583  | 56.1417  | 2.3  |
| -3.058    | 57.058   | 851   | 4012005   | SpatialQMatch | 3.8    | 16.5   | Invermuick         | NA                  | -2.34  | NO      | Matched wrong river pixel                   | 102     | -3.075   | 57.025   | 2.2  |
| -0.025    | 51.442   | 123   | 4039056   | SpatialQMatch | 0.4    | 1.7    | Catford Hill       | NA                  | -2.66  | NO      | Influenced river                            |         |          |          | 0.1  |
| 0.458     | 52.342   | 367   | 4033023   | SpatialQMatch | 0.2    | 1.2    | Beck Bridge        | NA                  | -2.99  | YES     | river with UpA<100km2                       |         |          |          | 1.7  |
| 4.092     | 44.308   | 234   | 6139070   | GRDCUpA       | 1.6    | 7.5    | GAGNIERES (BANNES) | GANIERE             | -2.65  | YES     | river with UpA<100km2                       |         |          |          | 2.8  |
| -1.558    | 51.425   | 322   | 4039028   | SpatialQMatch | 0.7    | 2.5    | Hungerford         | DUN                 | -1.66  | YES     | river with UpA<100km2                       |         |          |          | 1.7  |
| -6.358    | 54.225   | 212   | 4206002   | SpatialQMatch | 0.7    | 3.2    | Jerretspass        | NA                  | -2.58  | YES     | river with UpA<100km2                       |         |          |          | 1.4  |
| 5.092     | 51.142   | 125   | 6220345   | GRDCUpA       | 0.1    | 0.3    | MEERHOUT           | KLEINBROEKBEEK      | -3.66  | YES     | river with UpA<100km2                       |         |          |          | 2.4  |

|         |        |       |         |               |      |      |                                   |               |       |     |                                     |  |  |  |     |
|---------|--------|-------|---------|---------------|------|------|-----------------------------------|---------------|-------|-----|-------------------------------------|--|--|--|-----|
| -0.442  | 51.642 | 578   | 4039088 | SpatialQMatch | 0.5  | 2.8  | Rickmansworth                     | NA            | -3.41 | YES | river with UpA<100km2               |  |  |  | 1.4 |
| 0.542   | 52.558 | 356   | 4033029 | SpatialQMatch | 0.5  | 1.2  | Whitebridge                       | STRINGSIDE    | -0.50 | YES | river with UpA<100km2               |  |  |  | 2.1 |
| 16.458  | 48.125 | 126   | 6242715 | GRDCUpA       | 0.7  | 2.8  | SCHWECHAT<br>(RATHAUSPARK)        | KALTER GANG   | -2.20 | YES | river with UpA<100km3               |  |  |  | 2.3 |
| 17.108  | 59.275 | 226   | 6233411 | GRDCUpA       | 1.3  | 0.6  | AKERS KRUTBRUK                    | RACKSTA A     | -0.54 | NO  | Influenced by reservoir not in HERA |  |  |  | 1.3 |
| 2.342   | 48.675 | 956   | 6122130 | GRDCUpA       | 3.8  | 3.8  | MORSANG-SUR-ORGE                  | ORGE          | -0.43 | NO  | strong bias reduces KGE             |  |  |  | 0.9 |
| 5.275   | 46.175 | 100   | 6139640 | EFAS          | 0.5  | 1.9  | MONTAGNAT                         | REYSSOUZE     | -1.58 | YES | Upwaters of a karstic river         |  |  |  | 1.2 |
| -1.725  | 52.492 | 132   | 4028066 | SpatialQMatch | 1.0  | 2.5  | Coleshill                         | COLE          | -0.67 | NO  | Influenced river                    |  |  |  | 1.1 |
| 0.158   | 51.442 | 118   | 4040016 | SpatialQMatch | 0.5  | 1.2  | Crayford                          | CRAY          | -0.44 | NO  | Influenced river                    |  |  |  | 1.3 |
| -20.358 | 63.858 | 585   | 6401150 | GRDCUpA       | 44.7 | 22.7 | ARBAEJARFOSS                      | YTRI-RANGA    | -1.98 | NO  |                                     |  |  |  | 1.0 |
| -0.008  | 41.242 | 3807  | 6226550 | GRDCUpA       | 1.6  | 3.2  | CASPE                             | RIO GUADALOPE | -0.44 | NO  |                                     |  |  |  | 0.9 |
| 15.708  | 48.275 | 839   | 6242515 | GRDCUpA       | 4.7  | 13.0 | HERZOGENBURG<br>(STRASSENBRUECKE) | TRAISEN       | -0.95 | NO  |                                     |  |  |  | 1.0 |
| 26.342  | 56.358 | 616   | 6373226 | GRDCUpA       | 3.0  | 6.6  | KULENIEKI                         | USA           | -0.44 | NO  |                                     |  |  |  | 2.0 |
| 19.675  | 53.442 | 792   | 990159  | SpatialQMatch | 5.0  | 3.3  | KULIGI                            | NA            | -0.42 | NO  |                                     |  |  |  | 1.7 |
| -1.775  | 51.092 | 164   | 4043004 | SpatialQMatch | 0.8  | 1.8  | Laverstock                        | NA            | -0.44 | NO  |                                     |  |  |  | 2.1 |
| 20.475  | 53.775 | 580   | 990072  | SpatialQMatch | 3.7  | 2.6  | OLSZTYN-KORTOWO                   | NA            | -0.87 | NO  |                                     |  |  |  | 2.1 |
| -0.975  | 38.075 | 14456 | 2007028 | SpatialQMatch | 6.0  | 15.6 | ORIHUELA                          | NA            | -0.81 | NO  |                                     |  |  |  | 2.6 |
| 24.292  | 54.125 | 4294  | 6574721 | GRDCUpA       | 32.4 | 16.8 | PUVOCIAI                          | MERKYS        | -0.51 | NO  |                                     |  |  |  | 1.1 |
| 19.375  | 50.275 | 471   | 990137  | SpatialQMatch | 3.9  | 2.2  | SLAWKÓW                           | NA            | -2.11 | NO  |                                     |  |  |  | 3.3 |
| 17.192  | 54.675 | 815   | 990132  | SpatialQMatch | 8.3  | 7.2  | SMOLDZINO                         | NA            | -0.46 | NO  |                                     |  |  |  | 2.0 |
| 17.508  | 53.875 | 1659  | 990090  | SpatialQMatch | 10.2 | 8.0  | SWORNEGACIE                       | NA            | -1.19 | NO  |                                     |  |  |  | 1.8 |
| 17.908  | 53.592 | 2477  | 6458560 | GRDCUpA       | 19.4 | 11.6 | TUCHOLA                           | BRDA          | -1.09 | NO  |                                     |  |  |  | 2.1 |
| 25.125  | 54.442 | 445   | 6574723 | GRDCUpA       | 4.0  | 2.2  | VOKE-ZAGARINE                     | MERKYS        | -1.13 | NO  |                                     |  |  |  | 1.3 |

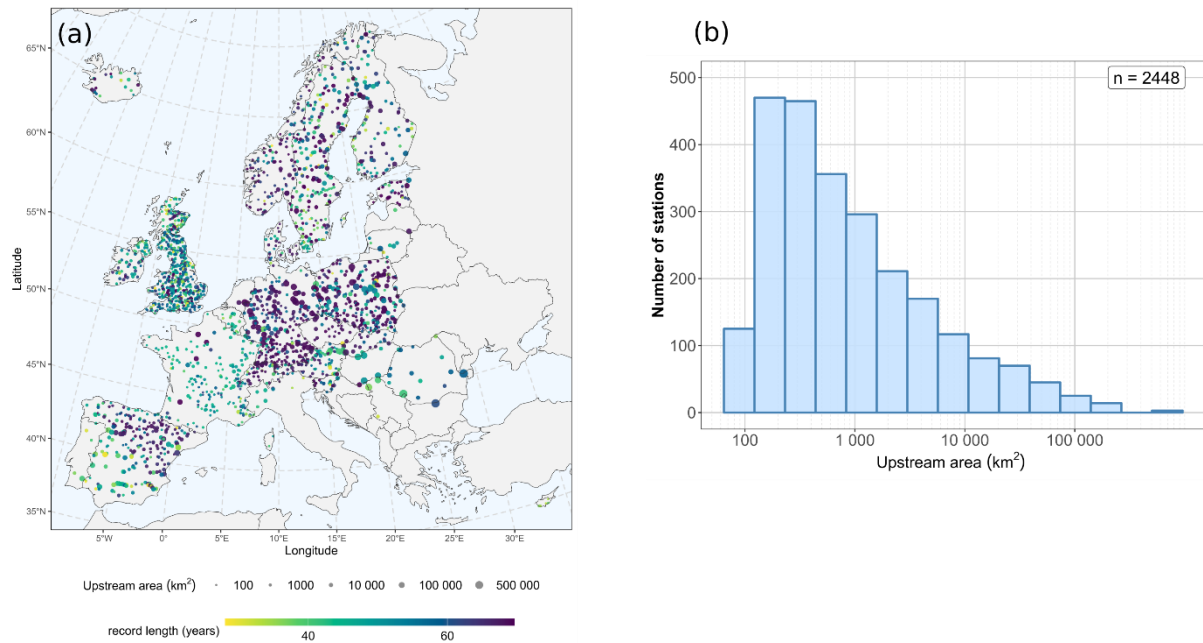

**Figure S2: Metadata of the 2448 river gauging stations used in the validation of HERA. It shows (a) the location, upstream area and record length associated to each stations and (b) the distribution of upstream area of the selected river gauging stations.**

## Comparison with other hydrological datasets

### Reported performances

In **Table S6**, we provide a summary of the main characteristics of HERA and three other recent hydrological reanalysis mentioned in the article: GLOFAS-ERA5 (Harrigan et al., 2020), GRFR (Yang et al., 2021) and a simulation from the mHM model (Samaniego et al., 2019), hereafter referred as EUmHM. We can appreciate from **Table S6** the difference between each dataset and their validation. HERA seems to outperform the two global reanalysis in terms of KGE', which is not surprising due to the better data coverage in Europe, and to the increased diversity of landscapes and climates at global scale.



**Table S 6: Characteristics and reported performances of HERA and three recent hydrological reanalysis**

| <b>Dataset</b>                                           | <b>HERA</b>                         | <b>GLOFAS-ERA5</b>     | <b>EUmHM</b>                 | <b>GRFR</b>                                  |
|----------------------------------------------------------|-------------------------------------|------------------------|------------------------------|----------------------------------------------|
| <b>Reference</b>                                         | Tilloy et al. (2024)                | Harrigan et al. (2020) | Samaniego et al. (2019)      | Yang et al. (2021)                           |
| <b>Spatial coverage</b>                                  | Europe                              | Global                 | Europe                       | Global                                       |
| <b>Temporal coverage</b>                                 | 1951-2020                           | 1979-Present           | 1960-2010                    | 1980-2019                                    |
| <b>Spatial resolution</b>                                | 0.0167°                             | 0.25 °                 | 5km ( $\approx 0.05^\circ$ ) | 0.05°                                        |
| <b>validation catchments (N)</b>                         | 2848                                | 1801                   | 357                          | 14698                                        |
| <b>Median validation catchment area (km<sup>2</sup>)</b> | 583<br>(27% < 250 km <sup>2</sup> ) | 30 046                 | 1 700                        | Not provided<br>(29% < 250 km <sup>2</sup> ) |
| <b>KGE' (median)</b>                                     | 0.55<br>(58% >0.5)                  | 0.33                   | 0.6                          | Not provided<br>(27% > 0.5)                  |
| <b>Pearson r (median)</b>                                | 0.73                                | 0.61                   | 0.8                          | Not provided                                 |
| <b>Bias ratio (<math>\pm 20\%</math>)</b>                | 50                                  | 28                     | 50                           | 44                                           |
| <b>Variability ratio (%&lt;1)</b>                        | 83                                  | 61                     | 65                           | Not provided                                 |

The reported performances of HERA and EUmHM are very similar. A deeper comparison between HERA and EUmHM is provided below.

### **Comparison with the EUmHM hydrological run over 515 European catchments**

Here we compare HERA with the EUmHM run generated with the mHM model (Kumar et al., 2013; Samaniego et al., 2010). This hydrological simulation was recently used to assess flood-generating mechanisms in Europe (Tarasova et al., 2023). HERA and EUmHM use a different model, different meteorological input (bias-adjusted downscaled ERA5-land vs downscaled E-OBS) and different resolution (1' and 6-hourly vs 5km and daily). We were provided daily discharge data by Larisa Tarasova for a set of 1444 European catchments (mean upstream area=2602 km<sup>2</sup>) over the period 1960-2010. We performed a spatial matching similar to the one presented in **Section 3** of the main article, using upstream area as a matching parameter and averaged discharge as a filtering measure (same rules as in **Section 3**). Over the 2448 catchments used in the validation of HERA (**Section 3**), a total 515 common catchments between HERA and the provided EUmHM points were identified (**Figure S3**).

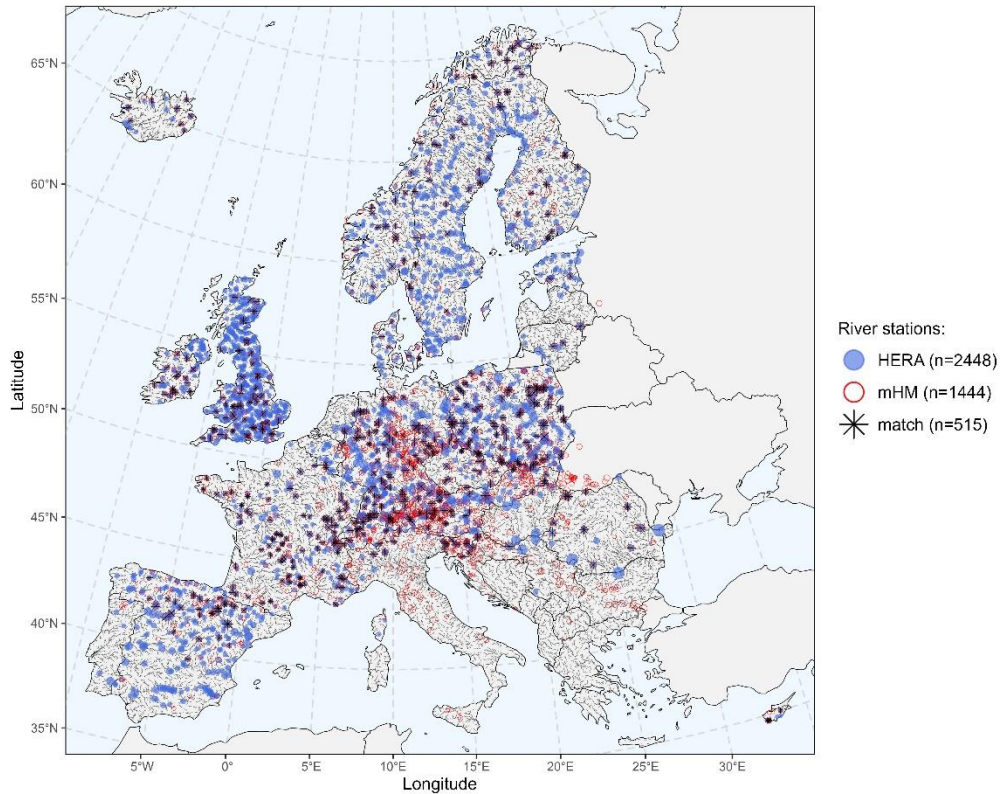

**Figure S3: Location of the catchments used in the HERA validation (blue dots), EUMHM catchments (red circles) and common catchments obtained from the matching procedure.**

As displayed in **Figure S4** and **Figure S5**, HERA outperforms EUMHM over the common catchments in terms of  $KGE'$  ( $KGE'_{med(HERA)} = 0.57$  and  $KGE'_{med(EUMHM)} = 0.52$ ). **Figure S4.a** display the differences in performance spatially while **Figure S4.b** shows the ordered difference in  $KGE'$ . From **Figure 4.b**, we can see that HERA outperforms EUMHM in 54% (280) of the catchments. EUMHM seems to be penalized by a very low  $KGE'$  in some catchments. The lower performance in mHM is driven by a higher bias (**Figure S6.b**), despite better correlations compared to HERA (**Figure S6.a**).

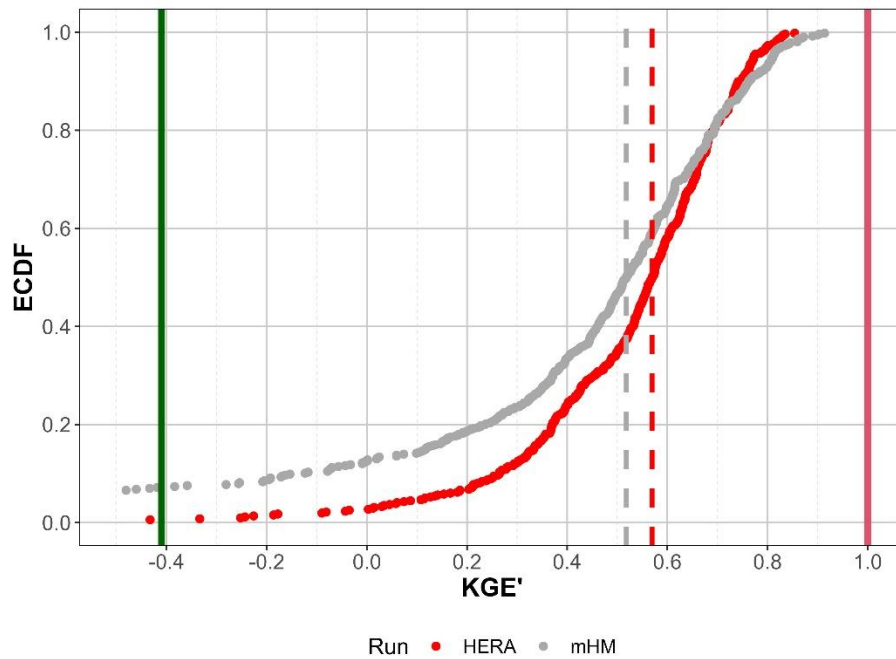

**Figure S4:** Cumulative probability distribution of KGE' for HERA (red) and EUMHM (grey) for the 515 common catchments. The green line represents the benchmark KGE' value (-0.41), the red line is the optimal value (1) and the two dashed vertical line show the median KGE' for both simulations.

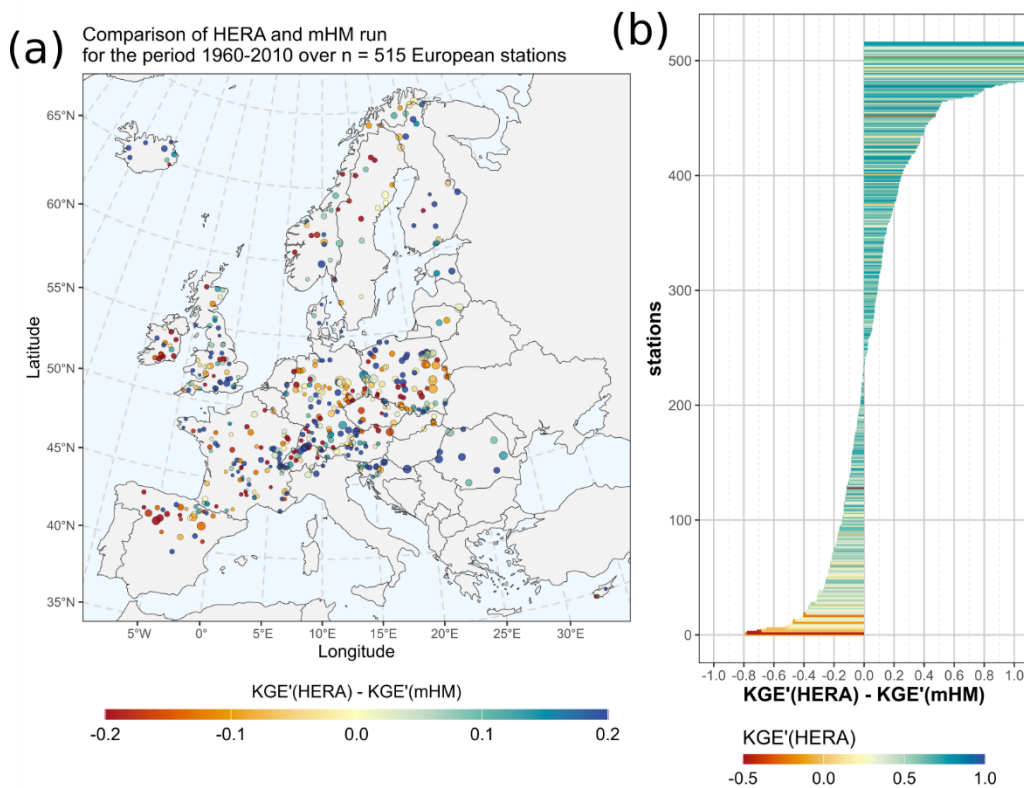

**Figure S5:** Performance comparison between HERA and EUMHM in terms of KGE', (a) difference in KGE' at each location and (b) ordered difference from lowest (EUMHM performs better) to highest (HERA performs better).

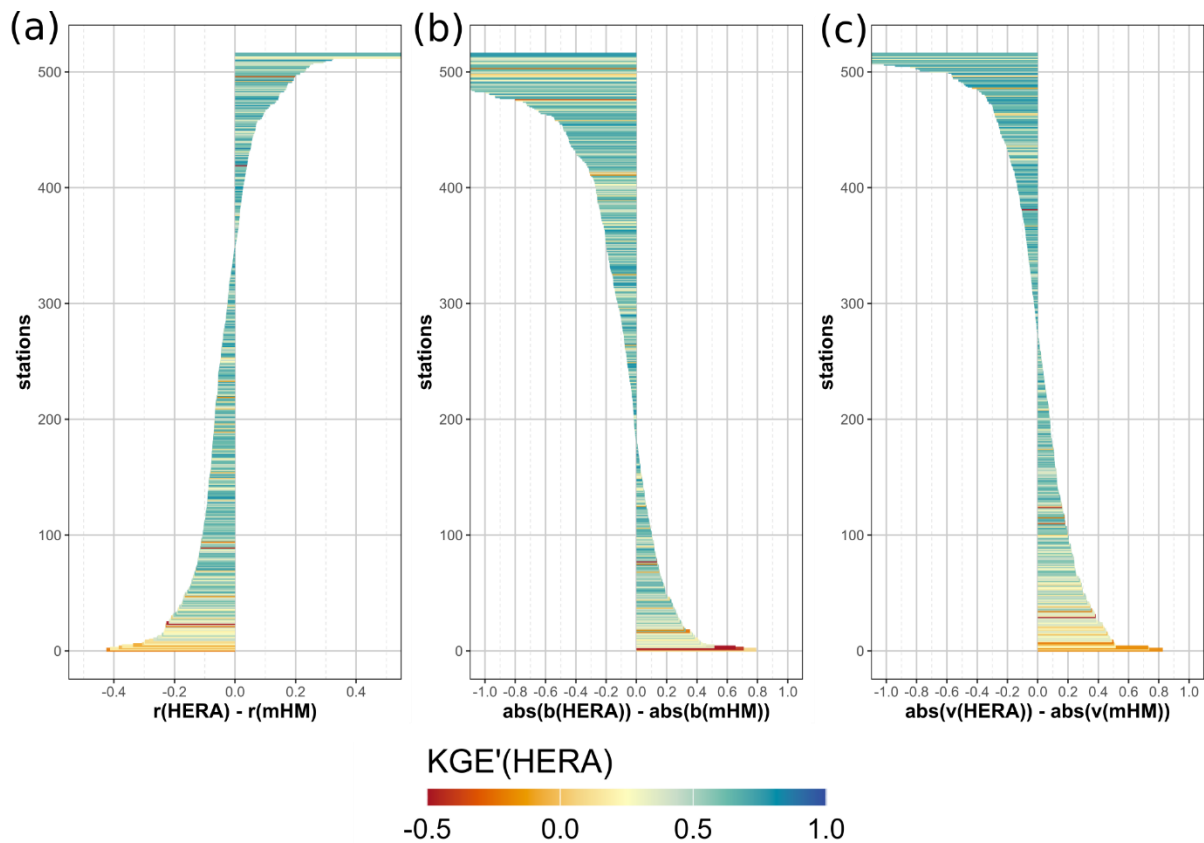

**Figure S 6: Ordered difference in the three components of KGE': (a) correlation (HERA < EUmHM for negative values), (b) absolute (1- $\beta$ ), with 0 being no bias (HERA > EUmHM for negative values), and (c) absolute (1- $\gamma$ ) with zero meaning that the variability is perfectly reproduced (HERA > EUmHM for negative values).**

## References

LISFLOOD static and parameter maps for Europe: <http://data.europa.eu/89h/f572c443-7466-4adf-87aa-c0847a169f23>, last access: 11 January 2024.

CEMS-Flood online documentation: <https://confluence.ecmwf.int/display/CEMS/CEMS-Flood>, last access: 14 December 2023.

Kumar, R., Samaniego, L., and Attinger, S.: Implications of distributed hydrologic model parameterization on water fluxes at multiple scales and locations, *Water Resources Research*, 49, 360–379, <https://doi.org/10.1029/2012WR012195>, 2013.

Samaniego, L., Kumar, R., and Attinger, S.: Multiscale parameter regionalization of a grid-based hydrologic model at the mesoscale, *Water Resources Research*, 46, <https://doi.org/10.1029/2008WR007327>, 2010.

Samaniego, L., Thober, S., Wanders, N., Pan, M., Rakovec, O., Sheffield, J., Wood, E. F., Prudhomme, C., Rees, G., Houghton-Carr, H., Fry, M., Smith, K., Watts, G., Hisdal, H., Estrela, T., Buontempo, C., Marx, A., and Kumar, R.: Hydrological Forecasts and Projections for Improved Decision-Making in the Water Sector in Europe, *Bulletin of the American Meteorological Society*, 100, 2451–2472, <https://doi.org/10.1175/BAMS-D-17-0274.1>, 2019.

Tarasova, L., Lun, D., Merz, R., Blöschl, G., Basso, S., Bertola, M., Miniussi, A., Rakovec, O., Samaniego, L., Thober, S., and Kumar, R.: Shifts in flood generation processes exacerbate regional flood anomalies in Europe, *Commun Earth Environ*, 4, 49, <https://doi.org/10.1038/s43247-023-00714-8>, 2023.
